# Supplementary material
Source: HighWire-hosted journal article supplement (https://gut.bmj.com/content/73/1/208)
Supplement: inline-supplementary-material-1 [file inline-supplementary-material-1.pdf]

**Supplementary Table 1** Participant characteristics and sample collection information

| Variable                                                                          | BNT162b2 (n=52) |
|-----------------------------------------------------------------------------------|-----------------|
| Age, years (median [IQR])                                                         | 4 [32.3-54]     |
| Female [Male]                                                                     | 46 [6]          |
| Seropositivity to SARS-CoV-2 (Reactive [Non-reactive])                            | 2 [50]          |
| Blood sample collected post 1 <sup>st</sup> vaccine (Yes [No])                    | 47 [5]          |
| Blood sample collected post 2 <sup>nd</sup> vaccine (Yes [No])                    | 18 [34]         |
| Baseline stool samples collected (Yes [No])                                       | 48 [4]          |
| Twelve-weeks post 1 <sup>st</sup> vaccine stool samples collected (Yes [No])      | 41 [11]         |
| Matching baseline and twelve-week stool samples collected (Yes [No])              | 38 [14]         |
| Dietary fibre grouping (Low [Moderate] High) (n=41)                               | 13 [14] 14      |
| Total dietary fibre intake, g/day (mean [SD]) (n=41)                              | 24.7 [11.9]     |
| Vegetarian (Yes [No]) (n=41)                                                      | 4 [37]          |
| Antibiotics taken within 9 months of collecting stool (Yes [No]) (n=41)           | 3 [38]          |
| Significant* change in weight or food intake over the past year (Yes [No]) (n=41) | 7 [34]          |

IQR – inter quartile range, SD – standard deviation. \* Significant body weight changes >10% weight gain or loss and significant changes in food intake included becoming vegetarian/vegan, stopped consuming gluten, dairy or sugar, increased fruit, or vegetable intake, etc.



**Supplementary Table 3** Equations used to calculate absolute (U/mL) and relative fractional avidity (%), and total absolute and relative fractional avidity indices

|                                           | Very low                                                                                                   | Low                                       | Medium                                      | High                                      | Very high                                   |
|-------------------------------------------|------------------------------------------------------------------------------------------------------------|-------------------------------------------|---------------------------------------------|-------------------------------------------|---------------------------------------------|
| Absolute fractional avidity (U/mL)        | $AFA_{vlo} = Y_0 - Y_{0.5}$                                                                                | $AFA_{lo} = Y_{0.5} - Y_{0.75}$           | $AFA_{med} = Y_{0.75} - Y_1$                | $AFA_{hi} = Y_1 - Y_2$                    | $AFA_{vhi} = Y_2$                           |
| Total absolute fractional avidity index   | $2 * AFA_{vhi} + 1 * AFA_{hi} + 0.25 * AFA_{med} + 0.25 * AFA_{lo} + 0.5 * AFA_{vlo}$                      |                                           |                                             |                                           |                                             |
| Relative fractional avidity (%)           | $RFA_{vlo} = \frac{AFA_{vlo}}{Y_0} * 100\%$                                                                | $RFA_{lo} = \frac{AFA_{lo}}{Y_0} * 100\%$ | $RFA_{med} = \frac{AFA_{med}}{Y_0} * 100\%$ | $RFA_{hi} = \frac{AFA_{hi}}{Y_0} * 100\%$ | $RFA_{vhi} = \frac{AFA_{vhi}}{Y_0} * 100\%$ |
| Total relative fractional avidity (TRFA)* | $TRFA = -0.533 * RFA_{vlo} + 0.0269 * RFA_{lo} + 0.477 * RFA_{med} + 0.492 * RFA_{hi} + 0.495 * RFA_{vhi}$ |                                           |                                             |                                           |                                             |

AFA – absolute fractional avidity, RFA – relative fractional avidity

\*Based on eigenvalue plot loadings of each avidity for PC1 of all avidity data
